# Supplementary material for: Towards non-invasive monitoring of non-melanoma skin cancer using spatially offset Raman spectroscopy
Source: Royal Society of Chemistry journal article supplement (doi:10.1039/d3an00684k), 2023-01-01
Supplement: d3an00684k4.pdf [file d3an00684k4.pdf]

**Supplementary Material:**

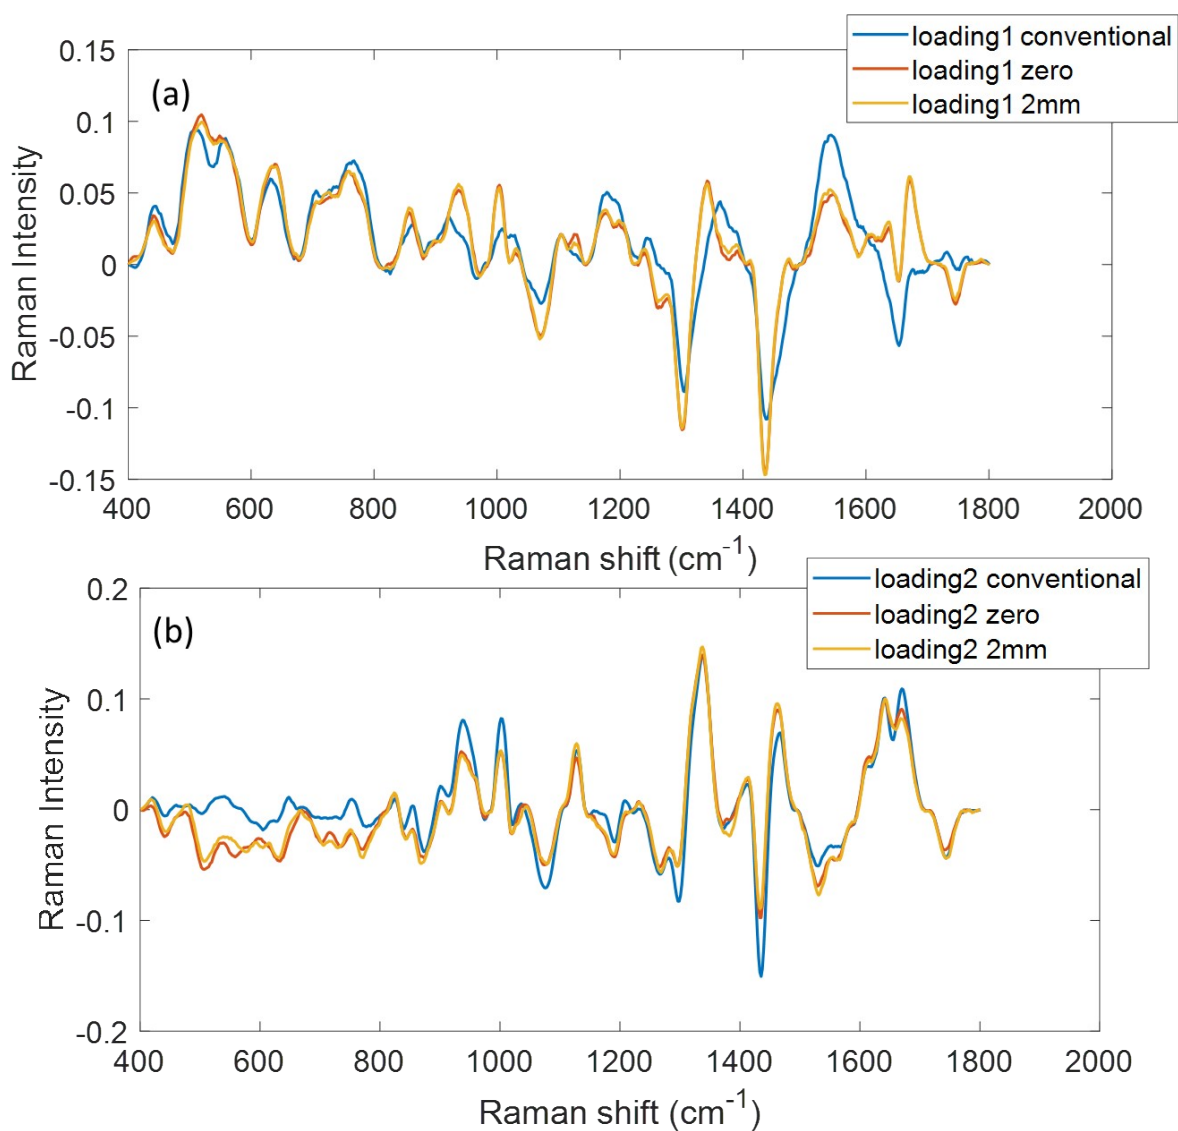

**Figure S1:** PC 1 (a) and 2 (b) loadings for all employed modalities (conventional, zero and 2 mm offset).

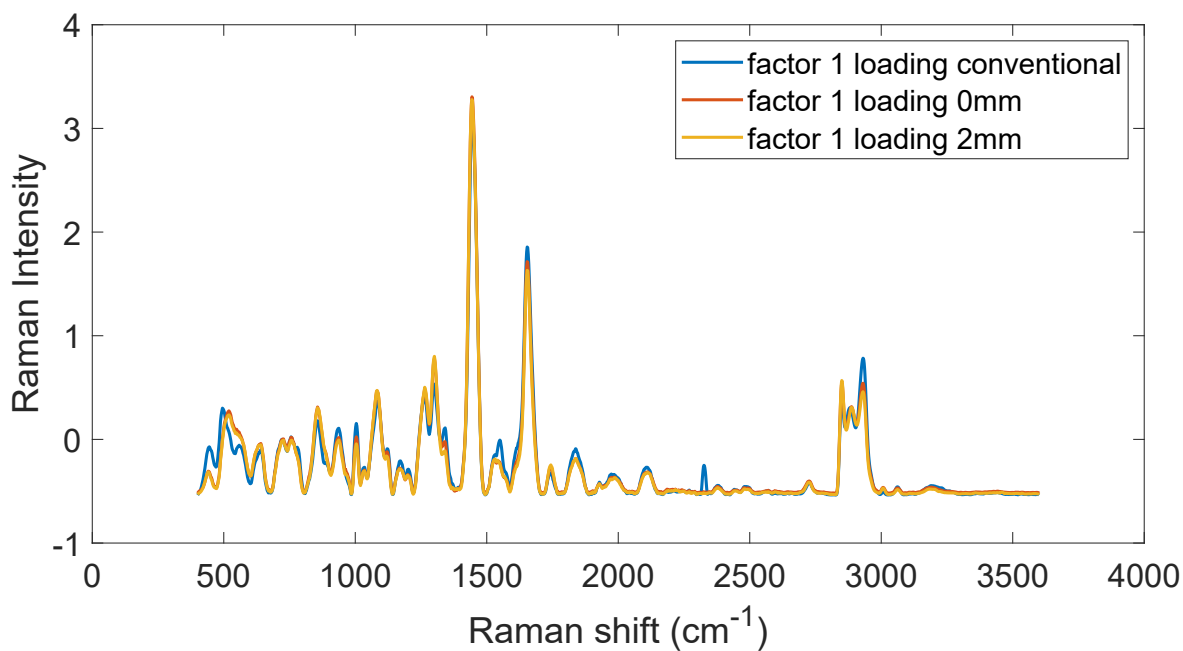

**Figure S2:** Factor score 1 spectra obtained from MFA plotted against wavenumber for all employed modalities (conventional, zero and 2 mm offset).

| Modality                     | Patients |     | Samples |     | Measurements |     |
|------------------------------|----------|-----|---------|-----|--------------|-----|
|                              | BCC      | SCC | BCC     | SCC | BCC          | SCC |
| Conventional back-scattering | 13       | 8   | 14      | 8   | 40           | 23  |
| 0 mm offset                  | 13       | 8   | 14      | 8   | 43           | 23  |
| 2 mm offset                  | 13       | 8   | 14      | 8   | 43           | 23  |

**Table S1:** Summary of patients, samples and measurements involved in different modalities of the study.
